# Supplementary material for: Observed Relationship between Ozone and Temperature for Urban Nonattainment Areas in the United States
Source: MDPI journal article supplement (doi:10.3390/atmos12101235), 2021-09-22
Supplement: s1 [file s1]

# Supplementary Materials: Observed Relationship between Ozone and Temperature for Urban Nonattainment Areas in the United States

Matthew Ninneman and Daniel Jaffe

**Table S1.** List of urban nonattainment areas (NAAs), O<sub>3</sub> monitoring sites, and meteorological data sources used in this analysis. The region of the U.S. where the urban NAAs are located, the Air Quality System (AQS) O<sub>3</sub> monitor IDs, and the Global Historical Climatology Network daily (GHCNd) IDs are given in parentheses.

| Urban NAA<br>(Region)             | O <sub>3</sub> monitoring site name<br>(AQS O <sub>3</sub> monitor ID) | Meteorological site name<br>(GHCNd ID)                              |
|-----------------------------------|------------------------------------------------------------------------|---------------------------------------------------------------------|
| Atlanta, GA<br>(East U.S.)        | United Avenue<br>(13-121-0055)                                         | Atlanta Hartsfield International Airport<br>(USW00013874)           |
| Baltimore, MD<br>(East U.S.)      | Edgewood<br>(24-025-1001)                                              | Baltimore Washington International<br>Airport (USW00093721)         |
| Hartford, CT<br>(East U.S.)       | N/A<br>(09-013-1001)                                                   | Hartford Brainard Field<br>(USW00014752)                            |
| New York, NY<br>(East U.S.)       | Sherwood Island Connector<br>(09-001-9003)                             | JFK International Airport<br>(USW00094789)                          |
| Philadelphia, PA<br>(East U.S.)   | N/A<br>(42-017-0012)                                                   | Philadelphia International Airport<br>(USW00013739)                 |
| Washington, D.C.<br>(East U.S.)   | McMillan<br>(11-001-0043)                                              | Washington Reagan Airport<br>(USW00013743)                          |
| Chicago, IL<br>(Midwest U.S.)     | Chiwaukee Prairie<br>(55-059-0019)                                     | Chicago O'Hare International Airport<br>(USW00094846)               |
| Cincinnati, OH<br>(Midwest U.S.)  | Sycamore<br>(39-061-0006)                                              | Cincinnati Northern Kentucky<br>International Airport (USW00093814) |
| Cleveland, OH<br>(Midwest U.S.)   | Eastlake<br>(39-085-0003)                                              | Cleveland Hopkins International<br>Airport (USW00014820)            |
| Detroit, MI<br>(Midwest U.S.)     | East 7 Mile<br>(26-163-0019)                                           | Detroit City Airport<br>(USW00014822)                               |
| Milwaukee, WI<br>(Midwest U.S.)   | Harrington Beach Park<br>(55-089-0009)                                 | Milwaukee Mitchell Airport<br>(USW00014839)                         |
| Bakersfield, CA<br>(West U.S.)    | Mojave<br>(06-029-0011)                                                | Bakersfield Airport<br>(USW00023155)                                |
| Las Vegas, NV<br>(West U.S.)      | Joe Neal<br>(32-003-0075)                                              | McCarran International Airport<br>(USW00023169)                     |
| Los Angeles, CA<br>(West U.S.)    | Azusa<br>(06-037-0002)                                                 | Los Angeles International Airport<br>(USW00023174)                  |
| Salt Lake City, UT<br>(West U.S.) | Hawthorne<br>(49-035-3006)                                             | Salt Lake City International Airport<br>(USW00024127)               |

| Urban NAA<br>(Region)            | O <sub>3</sub> monitoring site name<br>(AQS O <sub>3</sub> monitor ID) | Meteorological site name<br>(GHCNd ID)                                                                                                        |
|----------------------------------|------------------------------------------------------------------------|-----------------------------------------------------------------------------------------------------------------------------------------------|
| Phoenix-Mesa, AZ<br>(West U.S.)  | North Phoenix<br>(04-013-1004)                                         | Phoenix Airport<br>(USW00023183)                                                                                                              |
| Riverside, CA<br>(West U.S.)     | San Bernardino<br>(06-071-9004)                                        | Riverside Fire Station 3<br>[1995–1998, 2007–2008]<br>(USC00047470)<br>Riverside Municipal Airport<br>[1999–2006, 2009–2020]<br>(USW00003171) |
| Sacramento, CA<br>(West U.S.)    | Sacramento-1309 T Street<br>(06-067-0010)                              | Sacramento Executive Airport<br>(USW00023232)                                                                                                 |
| San Diego, CA<br>(West U.S.)     | Alpine<br>(06-073-1006)                                                | San Diego International Airport<br>(USW00023188)                                                                                              |
| San Francisco, CA<br>(West U.S.) | Livermore<br>(06-001-0007)                                             | San Francisco International Airport<br>(USW00023234)                                                                                          |

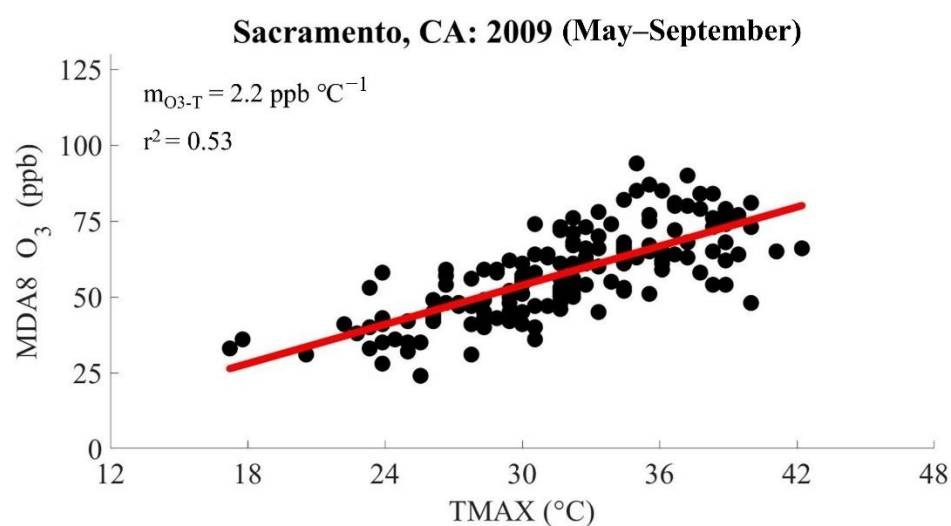

**Figure S1.** Example plot of maximum daily 8-hour average (MDA8) O<sub>3</sub> (ppb) versus daily maximum temperature (TMAX; °C) for Sacramento, CA in May–September 2009. The slope ( $m_{O_3-T}$ ; ppb °C<sup>−1</sup>) and the coefficient of determination ( $r^2$ ) are also shown.
